1 **Transcriptional signatures of wheat inflorescence development**

2 Carl VanGessel<sup>1</sup>, James Hamilton<sup>1</sup>, Facundo Tabbita<sup>2,3</sup>, Jorge Dubcovsky<sup>4,5</sup>, Stephen Pearce<sup>1,6,\*</sup>

3

4 <sup>1</sup> Department of Soil and Crop Sciences, Colorado State University, Fort Collins, CO 80523, USA.

5 <sup>2</sup> Departamento de Genética, Escuela Técnica Superior de Ingeniería Agronómica y de Montes,  
6 Universidad de Córdoba, Córdoba, Spain

7 <sup>3</sup> Instituto Nacional de Tecnología Agropecuaria, Instituto de Recursos Biológicos, Las Cabañas y los  
8 Reseros s/n, Hurlingham (1686), Buenos Aires, Argentina.

9 <sup>4</sup> Department of Plant Sciences, University of California, Davis, CA 95616, USA.

10 <sup>5</sup> Howard Hughes Medical Institute, Chevy Chase, MD 20815, USA.

11 <sup>6</sup> Current address: Rothamsted Research, Harpenden, Hertfordshire, AL5 2JQ, UK.

12

13 \*Corresponding author

14

15 Email addresses:

16 Carl VanGessel – [Carl.vangessel@colostate.edu](mailto:Carl.vangessel@colostate.edu)

17 James Hamilton – [jrrhamilt@gmail.com](mailto:jrrhamilt@gmail.com)

18 Facundo Tabbita - [tabbita.facundo@inta.gob.ar](mailto:tabbita.facundo@inta.gob.ar)

19 Jorge Dubcovsky– [jdubcovsky@ucdavis.edu](mailto:jdubcovsky@ucdavis.edu)

20 Stephen Pearce – [Stephen.pearce@rothamsted.ac.uk](mailto:Stephen.pearce@rothamsted.ac.uk)

## 21 **ABSTRACT**

22 In order to maintain global food security, it will be necessary to increase yields of the cereal crops that  
23 provide most of the calories and protein for the world's population, which includes common wheat  
24 (*Triticum aestivum* L.). An important factor contributing to wheat yield is the number of grain-holding  
25 spikelets which form on the spike during inflorescence development. Characterizing the gene regulatory  
26 networks controlling the timing and rate of inflorescence development will facilitate the selection of  
27 natural and induced gene variants that contribute to increased spikelet number and yield.

28 In the current study, co-expression and gene regulatory networks were assembled from a temporal wheat  
29 spike transcriptome dataset, revealing the dynamic expression profiles associated with the progression  
30 from vegetative meristem to terminal spikelet formation. Consensus co-expression networks revealed  
31 enrichment of several transcription factor families at specific developmental stages including the  
32 sequential activation of different classes of MIKC-MADS box genes. This gene regulatory network  
33 highlighted interactions among a small number of regulatory hub genes active during terminal spikelet  
34 formation. Finally, the *CLAVATA* and *WUSCHEL* gene families were investigated, revealing potential  
35 roles for *TaCLE13*, *TaWOX2*, and *TaWOX7* in wheat meristem development. The hypotheses generated  
36 from these datasets and networks further our understanding of wheat inflorescence development.

## 37 **INTRODUCTION**

38 The world population is expected to exceed nine billion people by 2050, signaling that further increases in  
39 grain production will be required to ensure food security <sup>1</sup>. Because there remain few opportunities to  
40 expand arable land area, increasing the yield of major cereal crops through genetic improvement will be  
41 critical to meet this goal. In common wheat (*Triticum aestivum* L.) characterizing the genetic pathways  
42 regulating grain size and grain number will facilitate the rational combination of superior alleles in wheat  
43 breeding programs to help drive continued yield improvements <sup>2</sup>.

44 Grain number in wheat is determined to a large extent by inflorescence architecture. By integrating  
45 photoperiod and temperature cues, the vegetative shoot apical meristem (SAM) transitions to the  
46 reproductive inflorescence meristem (IM), during which the developing spike passes through the  
47 characteristic double ridge (DR) stage, forming a lower leaf ridge and an upper spikelet ridge<sup>3</sup>. The lower  
48 leaf ridge is repressed by the MIKC-MADS box transcription factors (TFs) *VRN1*, *FUL2* and *FUL3*<sup>4</sup>,  
49 whereas the upper ridges develop glumes, lemmas, and floret primordia. As the IM elongates, spikelet  
50 meristems are added at the growing apex, while basal spikelets continue to develop. Wheat spikes are  
51 determinate structures and the addition of lateral spikelets ends when the terminal spikelet is formed.  
52 Therefore, spikelet number is determined by the timing and rate of meristem development preceding  
53 terminal spikelet formation. Each spikelet has the potential to form between three and six grains<sup>5</sup> and  
54 spikelet number is correlated with grain number and yield<sup>6-8</sup>.

55 Shoot meristems are organized around the organizing center and stem cell maintenance is governed by the  
56 conserved CLAVATA-WUSCHEL negative feedback loop<sup>9</sup>. In Arabidopsis, the homeodomain TF *WUS*  
57 induces *CLV3*, which encodes a secreted peptide that forms receptor complexes repressing *WUS*<sup>10</sup>.

58 Manipulation of this pathway confers variation in locule number in tomato (*Solanum lycopersicum*) and  
59 kernel row number in maize (*Zea mays*)<sup>11,12</sup>. The wheat genome contains 104 *CLAVATA3/EMBRYO*  
60 *SURROUNDING REGION (CLE)* peptides<sup>13</sup> and 44 WUSCHEL RELATED HOMEODOMAIN (WOX) TFs  
61<sup>14</sup>, but the specific ones regulating inflorescence meristem development in wheat are yet to be identified.

62 Inflorescence development is controlled by a complex regulatory network involving multiple classes of  
63 transcription factors (TFs) which orchestrate rapid and dynamic changes in gene expression. The Type II  
64 MIKC MADS-box TFs play critical roles in flower development across the angiosperms and can be  
65 divided into A, B, C, D and E-classes that interact mainly as tetrameric complexes in a spatially regulated  
66 manner to direct sepal (A- and E-), petal (A-, B-, E-), stamen (B-, C-, E-), and carpel development (C-  
67 and E-class genes)<sup>15,16</sup>. This family expanded during cereal evolution and the hexaploid wheat genome  
68 contains 201 MIKC MADS-box genes, classified into 15 phylogenetic subclades<sup>17</sup>.

69 The SHORT VEGETATIVE PHASE (SVP) subclade members *SVPI*, *VRT2*, and *SVP3* promote the  
70 transition from the vegetative SAM to the IM, along with the AP1/SQUA subclade genes *VRN1*, *FUL2*  
71 and *FUL3*<sup>4,18</sup>. Subsequently, AP1/SQUA genes suppress the expression of SVP genes, which may be  
72 required to promote interactions between AP1/SQUA proteins and the E-class MIKC-MADS proteins  
73 SEPELLATA1 (*SEP1*) and *SEP3*, which are predominantly expressed in floral organogenesis during  
74 early reproductive growth<sup>18</sup>. The natural *VRT2*<sup>pol</sup> allele from *Triticum polonicum* exhibits ectopic  
75 expression and is associated with elongated glumes and increased grain length<sup>19</sup>. *VRT2*-overexpression  
76 lines show reduced transcript levels of B-class (*PI* and *AP3*) and C-class (*AG1* and *AG2*) MIKC-MADS  
77 box genes, although the role of these latter subclades in wheat inflorescence development remains to be  
78 characterized<sup>18</sup>.

79 Although much has been learned about wheat inflorescence development from positional cloning, reverse  
80 genetics and comparative genetic approaches, we lack a full understanding of the regulatory networks  
81 controlling meristem determinacy and developmental transitions. Only a fraction of the hundreds of QTL  
82 for thousand kernel weight, kernel number per spike, and spikelet number have been cloned and validated  
83 to date, indicating that a large proportion of quantitative variation in these traits remains uncharacterized  
84<sup>7</sup>.

85 Transcriptomics provides a complementary approach to characterize the regulatory networks underlying  
86 inflorescence development that is empowered by an expanding set of wheat genomic resources<sup>20,21</sup>. Co-  
87 expression and gene regulatory networks (GRNs) are powerful tools to interpret temporal correlation and  
88 causal relationships between genes, and to help identify critical hub genes that coordinate development  
89<sup>22,23</sup>. Previous transcriptomic studies in wheat inflorescence tissues described the differential expression  
90 profiles of thousands of genes during vegetative and floral meristem development, including the stage-  
91 specific expression of different TFs and hormone biosynthesis and signaling genes<sup>24,25</sup>. A population-  
92 associative transcriptomic approach was used to identify regulators of wheat spike architecture, including  
93 *CEN2*, *TaPAP2/SEP1-6*, and *TaVRS1/HOX1*, which were validated in functional studies<sup>26</sup>.

94 In the current study, a series of co-expression and gene regulatory networks were assembled to  
95 characterize the predominant transcriptional profiles associated with the progression of wheat  
96 inflorescence development, revealing two consecutive regulatory shifts at the DR and TS stages. Core  
97 regulatory candidate genes were identified including both known TFs and novel candidates with potential  
98 roles in regulating spike architecture.

## 99 **RESULTS**

### 100 *Early wheat inflorescence development is defined by two major transcriptional shifts*

101 To characterize the wheat transcriptome during inflorescence development, RNA was sequenced from  
102 tetraploid durum wheat meristem tissue at five developmental stages; vegetative meristem (W1), double  
103 ridge (W2), glume primordium (W3.0), lemma primordium (W3.25), and terminal spikelet (W3.5) (Fig.  
104 1A)<sup>3</sup>. An average of 28.9 M reads per sample (79.6% of all reads) mapped uniquely to the A, B and U  
105 genomes of the IWGSC RefSeqv1.0 assembly. Of the 190,391 gene models on these chromosomes,  
106 82,019 (43.1%) were expressed (> zero TPM) and 45,243 (23.8%) had a mean expression greater than  
107 one TPM in at least one timepoint (Supplementary data 1). Of the 3,861 gene models annotated as TFs  
108 (2.0% of gene models), 2,874 (74.5%) were expressed (> zero TPM) and 1,703 (44.1%) had a mean  
109 expression greater than one TPM in at least one timepoint (Supplementary data 2).

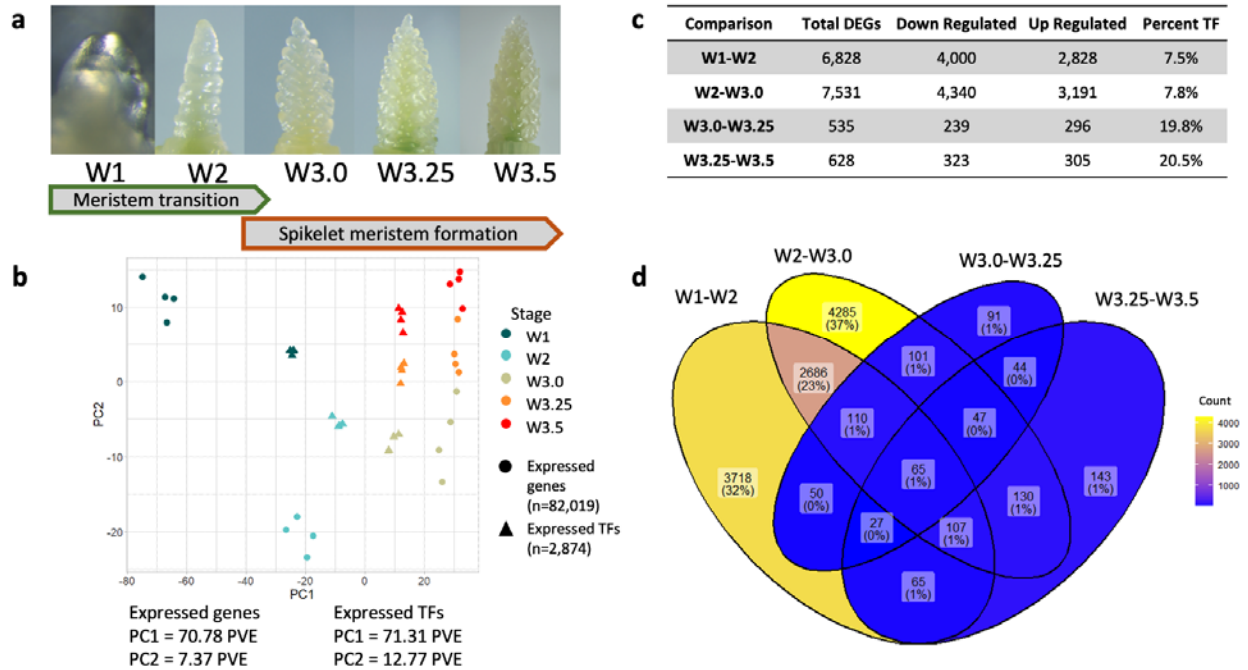

110

111 **Figure 1:** The early wheat inflorescence development transcriptome. (A) Sampling stages of Kronos  
 112 apical meristems according to the Waddington development scale<sup>3</sup>; W1.0 – vegetative meristem, W2 –  
 113 double ridge, W3.0 – glume primordium, W3.25 – lemma primordium, W3.5 – terminal spikelet. (B)  
 114 Whole transcriptome and transcription factor expression principal component analysis of samples, PC1  
 115 plotted on the x-axis and PC2 plotted on the y-axis. PVE = Percent Variance Explained. (C) Differentially  
 116 expressed genes (DEGs) in sequential pairwise comparisons (W1 – W2, W2 – W3.0, W3.0 – W3.25,  
 117 W3.25 – W3.5). The total number of genes, the number up- and down-regulated and the proportion  
 118 encoding transcription factors (TF) are described. (D) Venn diagram of DEGs in each consecutive  
 119 pairwise comparison from (C). Each category is shaded according to the number of sequential DEGs  
 120 shared among the four comparisons.

121

122 Comparison of the inflorescence development transcriptome with two whole-plant wheat development  
 123 transcriptome datasets<sup>27,28</sup> revealed 3,682 genes with spike-dominant expression profiles ( $\tau > 0.9$ , where  
 124 zero means constitutive expression and one indicates tissue-specific expression) (Supplementary data 3).

125 These genes were most strongly enriched for gene ontology (GO) terms relating to histone assembly and  
126 chromosome organization (Supplementary data 4), but also included 286 genes (7.8%) encoding TFs,  
127 including both *LEAFY* homoeologs, 15 GROWTH REGULATING FACTOR (GRF) TFs (of 20  
128 expressed during the time course), seven SHI RELATED SEQUENCE (SRS) TFs (out of ten), 20 TCP  
129 TFs (out of 49) and ten WOX TFs (out of 28, Supplementary data 3). Despite their known roles in  
130 regulating inflorescence development, only two out of 130 MIKC-MADS box and six out of 41 SPL TFs  
131 exhibited spike-dominant expression profiles, suggesting they play more diverse roles across plant  
132 development. There were 86 spike-specific genes with zero expression in all other stages of development  
133 ( $\tau = 1$ ) (Supplementary data 3).

134 Principal component analysis (PCA) using the whole transcriptome grouped the four biological replicates  
135 of each growth stage closely together and revealed that the majority of the transcriptional changes in this  
136 time course occur between the vegetative meristem and double ridge formation (Fig. 1B). These changes  
137 are described by PC1, which accounted for 71.8 percent variation explained (PVE). The transition from  
138 W1 to W2 was associated with 6,828 DEGs, 58.6% of which were downregulated (Fig. 1C,  
139 Supplementary data 5) and most significantly enriched for GO terms relating to “cell wall organization”,  
140 and lignin and hemicellulose metabolic processes (Supplementary data 6). Surprisingly, the 2,828  
141 (41.4%) DEGs upregulated between W1 and W2 were most significantly enriched for GO terms relating  
142 to photosynthesis despite the transition from leaf to floral meristem development (Supplementary data 5).  
143 The transition from W2 to W3.0 was associated with 7,531 DEGs (57.6% downregulated, Supplementary  
144 data 5, 6). The 3,191 DEGs upregulated between these timepoints were most significantly enriched for  
145 “meristem maintenance” and “flower development” GO terms (Supplementary data 6), suggesting that a  
146 number of genes triggering floral meristem formation are first activated at this stage.

147 By contrast, the transcriptomic changes from W3.0 to terminal spikelet formation (Fig. 1A) were  
148 distributed across PC2, which accounts for just 7.4 PVE (Fig. 1B) and were associated with 12.3-fold  
149 fewer DEGs than during the transition from vegetative meristem to stage W3.0 (Fig. 1C). Just 535 DEGs

150 were found between W3.0 and W3.25 (55.3% upregulated) and 628 DEGs between W3.25 and W3.5  
151 (48.6% upregulated) (Supplementary data 5). Genes upregulated across these three timepoints were most  
152 significantly enriched for “floral organ identity” (Supplementary data 6). There are fewer developmental  
153 changes between W3.25 and W3.5, relative to changes between W1 and W3.0, which may be due in part  
154 to basal and apical spikelets being at similar developmental stages between the latter timepoints<sup>29</sup>.

155 Of the 11,669 DEGs in at least one of the four consecutive pairwise comparisons, 899 (7.7%) encoded a  
156 TF, a 2.2-fold enrichment (hypergeometric  $P = 2.22 \text{ e-}62$ ). This enrichment was strongest after DR  
157 through terminal spikelet formation (5.2-fold enrichment,  $P = 8.73 \text{ e-}73$ ) where TFs accounted for 19.8%  
158 and 20.5% of all DEGs in pairwise comparisons (Fig. 1C). A PCA using only TF expression resulted in  
159 the same spatial arrangement of biological samples as in the whole-transcriptome PCA but with improved  
160 resolution between stages (Fig. 1B), and explained a greater proportion of variation for PC2 than when  
161 including the whole transcriptome (Fig. S1).

162 Taken together, these analyses show that less than half of the wheat transcriptome but nearly three-  
163 quarters of TFs are expressed during inflorescence development, including a set of genes which are  
164 spatially and temporally restricted to early inflorescence tissues. Terminal spikelet formation is associated  
165 with comparatively less transcriptional variation relative to stages preceding W3.25 and the strong  
166 enrichment in TFs suggests they play critical roles during this stage.

#### 167 *Co-expression networks reveal predominant transcriptome profiles during inflorescence development*

168 Co-expression networks were assembled to identify highly correlated modules of genes that define the  
169 major transcriptional profiles during early inflorescence development. All networks were assembled using  
170 a set of 22,566 genes that were differentially expressed in at least one of the ten possible pairwise  
171 combinations between timepoints (Fig. 1D) and that were also defined as significantly differentially  
172 expressed using ImpulseDE2, a package used to analyze longitudinal transcriptomic datasets  
173 (Supplementary data 5).



174 A consensus network constructed with repeated subsampling and randomized parameters with WGCNA  
 175 (see Materials and Methods) assembled these genes into 21 modules with a mean connectivity score of  
 176 0.485 (Fig. 2A, Supplementary data 7). A standard WGCNA network was also constructed using ‘best  
 177 practices’ parameters but with no repeated subsampling and randomization and had a connectivity score  
 178 of 0.327 which skewed to zero (Fig. 2A). In both networks, the majority of genes clustered into modules  
 179 1 and 2, which contained many of the same genes (Jaccard index > 0.86, Fig. S2). However, other  
 180 modules exhibited dissimilar expression profiles between networks (Jaccard index < 0.5), indicating the  
 181 consensus network clustered genes into a greater number of modules with distinct expression profiles not  
 182 captured in the standard network. Based on the improved correlation of co-clustered genes within  
 183 modules and the detection of distinct regulatory profiles, the consensus network was used in all  
 184 subsequent analyses.

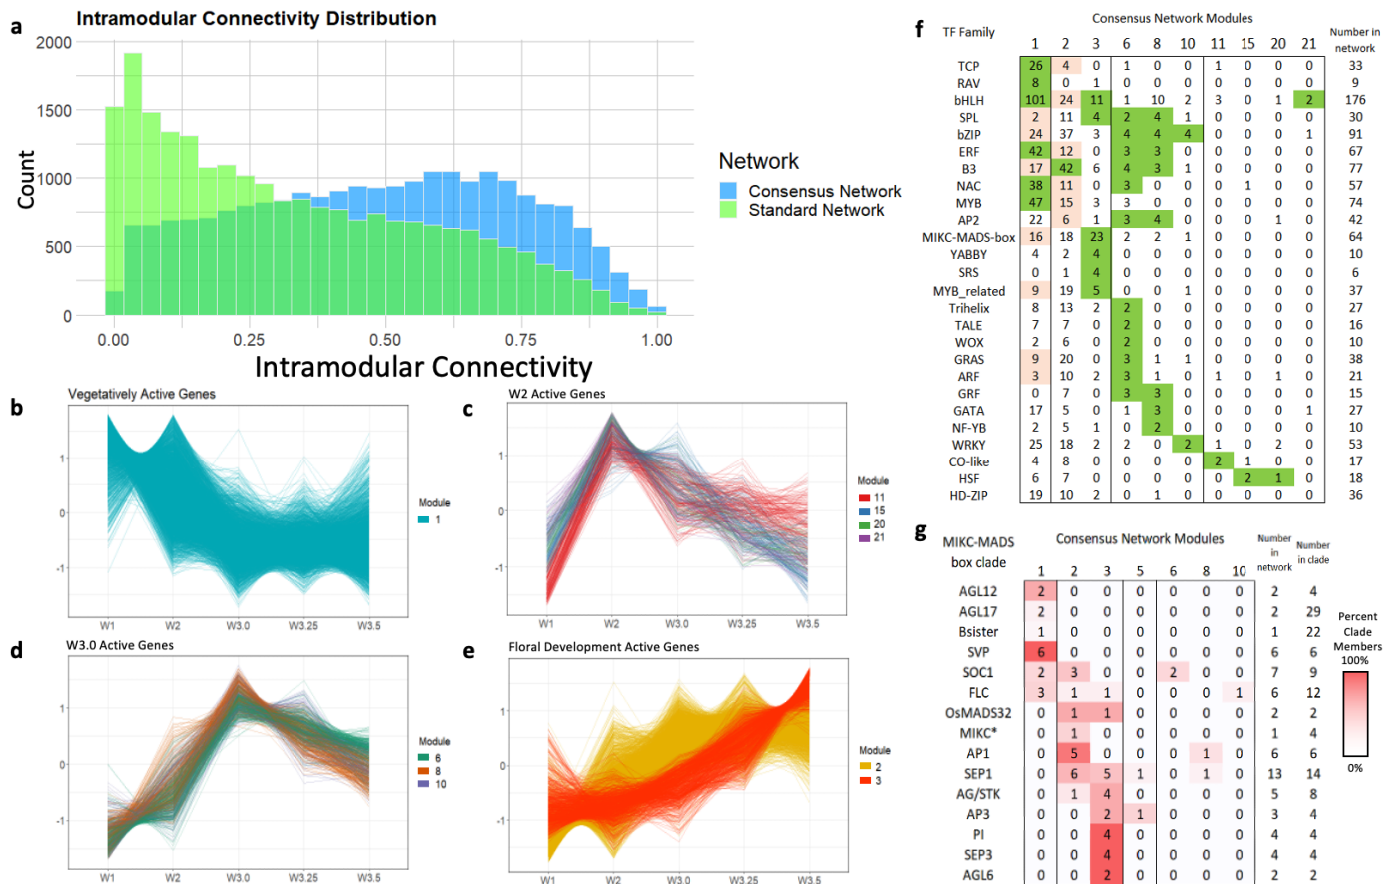

185

186 **Figure 2:** Co-expression networks showing the dominant transcriptional profiles during wheat  
187 inflorescence development. (A) Histogram of intramodular connectivity scores for 22,566 genes clustered  
188 in consensus (blue) or standard (green) network. (B - E) Expression profiles during inflorescence  
189 development of discussed modules in the consensus network. Lines represent scaled time course  
190 expression of each gene in the module. Modules with similar expression profiles are grouped together for  
191 comparison. (F) Number of TF family members clustered in each discussed consensus module. Modules  
192 enriched (green) or depleted (pink) for TF families are highlighted ( $P < 0.01$ ). (G) Number of MIKC-  
193 MADS box clade members clustered in each consensus modules. Co-expressed MIKC-MADS box  
194 groups are shaded relative to the total number of genes in the clade.

195

196 *Inflorescence meristem development is associated with the down-regulation of RAV and TCP*  
197 *transcription factors*

198 Module 1 was the largest in the network and grouped 10,102 genes defined by high transcript levels in the  
199 vegetative meristem and early meristem transition followed by down-regulation after DR and as the spike  
200 develops (Fig. 2B). Several TF families were enriched in this module, including 101 basic Helix-Loop-  
201 Helix (bHLH) TFs, 47 MYB TFs and eight of the nine differentially expressed RELATED TO ABI3  
202 AND VP1 (RAV) TFs included in the network (Fig. 2F). Twenty-six of the 33 total TCP TFs clustered in  
203 this module, nine of which were also spike-dominant expressed (Fig. 2F). Although at the whole family  
204 level MIKC-MADS TFs are significantly under-represented in module 1 (Fig. 2F, hypergeometric  $P = 8.6$   
205  $e-4$ ), all six SVP genes (*SVPI*, *VRT2* and *SVP3*) cluster in this module, consistent with their specific role  
206 regulating early stages of inflorescence development. In addition, both AGL12 subclade genes, and three  
207 of the six FLC subclade genes clustered in this module (Fig. 2G).

208 *A small number of genes are transiently expressed during double ridge formation*

209 Genes which showed a peak at the double ridge stage (W2) followed by a decline in later stages were  
210 clustered in modules 11 (131 genes), 15 (104 genes), 20 (44 genes) and 21 (42 genes). These clusters  
211 share broadly similar expression profiles (Fig. 2C) and were enriched for genes with spike-dominant  
212 expression profiles (between 2.1 and 3.0-fold enrichment). Genes in modules 15 and 20 were significantly  
213 enriched for development functional terms including “shoot system development” and “carpel  
214 development” (Supplementary data 8) including three *TERMINAL FLOWER1-like* genes  
215 *CENTRORADIALIS2 (CEN2)*, *CEN4*, and *CEN-5A* (Supplementary data 7). All three modules were  
216 enriched for the functional term “response to auxin” and included several auxin-responsive factors (ARF),  
217 indole-3 acetic acid (IAA), and SAUR-like protein family members, indicating that auxin signaling may  
218 promote double ridge formation.

219 *Inflorescence transition and spikelet architecture genes are upregulated at W3.0*

220 Modules 6 (267 genes), 8 (211 genes), and 10 (144 genes) share broadly similar profiles defined by  
221 maximum expression at stage W3.0 and subsequent downregulation (Fig. 2D). Each of these modules was  
222 significantly enriched (between 2.3 and 5.3-fold) for spike-dominant genes, indicating they likely play  
223 highly specific roles restricted to developing meristems and inflorescence initiation. Module 6 included  
224 18 genes previously associated with variation in spikelet number and five orthologs of rice genes with  
225 roles in panicle development, including the ERF TF *WHEAT FRIZZY PANICLE (WFZP)* and *KAN2*, a  
226 MYB TF which functions in establishing lateral organ polarity in *Arabidopsis*<sup>30,31</sup>.

227 *Inflorescence and spikelet meristem formation is associated with sequential activation of different classes*  
228 *of TFs*

229 The 8,971 genes in module 2 were defined by the inverse transcriptional profile to module 1, with low  
230 expression in the vegetative meristem followed by sustained upregulation from the double ridge stage  
231 onwards (Fig. 2E). Transcription factors were under-represented in this module, and only the B3 family  
232 (42 of 77 B3 TFs assembled in the co-expression network) was significantly enriched (Fig. 2F). There  
233 were 18 MIKC-MADS box TFs which were upregulated early in the transition to the inflorescence

234 meristem including all genes in the AP1/SQUA subclade (with the exception of *VRN-A1*) and six of the  
235 thirteen genes in the SEP1 subclade (Fig. 2G). Several genes with characterized roles in inflorescence  
236 development clustered in this module, including *FLOWERING LOCUS T2 (FT-A2)*, *Q*, and *RAMOSA2*  
237 (*TaRA-B2*) (Supplementary data 7)<sup>32,33</sup>.

238 The 708 genes clustered in module 3 exhibited a similar transcriptional profile to module 2, with a  
239 delayed upregulation and stronger peak at the terminal spikelet stage (Fig. 2E). These genes are  
240 significantly enriched for developmental functional terms including “specification of floral organ  
241 identity”, suggesting they include floral patterning and developmental genes that regulate spikelet  
242 meristem formation (Supplementary data 8). This module was significantly enriched for both spike-  
243 dominant expressed genes (106 genes,  $P < 0.001$ ) and for TFs (86 genes, 12.1%,  $P < 0.001$ ), consistent  
244 with pairwise DE analysis between stages W3.0 and W3.5 (Fig. 1C). These included four members of the  
245 SRS TF family, four YABBY TFs, and the HD-zip TFs *Grain Number Increase 1 (GN1)* and *HOX2*  
246 (Supplementary data 7). All members of the MIKC-MADS subclades PI, AGL6 and SEP3 were clustered  
247 in module 3, as well as two of the three AP3 subclade genes, four of the five AG/STK subclade genes and  
248 five SEP1 subclade genes (Fig. 2G).

#### 249 *Gene regulatory networks predict high-confidence interactions between transcription factors*

250 To identify the most robust co-expression patterns, the consensus adjacency matrix used for previous co-  
251 expression analyses was filtered for genes which co-clustered with at least one gene every time they were  
252 co-sampled in 1,000 networks assembled with variable, randomized parameters. The 18,174 genes that  
253 met this criterion were assembled into a consensus100 network consisting of 924 modules with a median  
254 size of three (Supplementary data 7).

255 Module 9 of this network comprised 167 genes (including 32 TFs) which were most highly expressed at  
256 the terminal spike stage (Fig. S3) and significantly enriched for the GO terms “specification of floral  
257 organ identity” and “flower development” (Supplementary data 9), suggesting it may represent a core  
258 regulatory network for wheat spikelet and/or floret development. The genes with the highest connectivity

259 (Kw, a measure of each gene's intramodular co-expression) in this module are *SEP1-A2* and *SEP1-B2*,  
260 which may be related with the intermediate position of the *SEP* genes between the meristem identity  
261 *SQUAMOSA* MADS-BOX genes and the anther and carpel development MADS-box genes. This module  
262 also groups *WAPO-A1*, that influences spikelet number and stamen identity<sup>34</sup> and a gene encoding an F-  
263 box protein that is a component of an SCF ubiquitin ligase that may be targeted by *TBI*<sup>35</sup> (Supplementary  
264 data 7).

265 To predict interactions between TFs during inflorescence development, a *de novo* Causal Structure  
266 Inference (CSI) network was constructed using all 970 TFs from the consensus100 network. This gene  
267 regulatory network consisted of 704 genes (nodes) with 5,604 predicted interactions (edges) with  
268 interaction strength (edge weight) > 0.001 (Supplementary data 10). To prioritize the most important  
269 regulatory candidate genes, the network was screened for interactions with an edge weight  $\geq 0.03$ , leaving  
270 88 genes with 177 interactions. The majority of these genes were from consensus modules 1 (37 genes,  
271 42.0%) and 3 (36 genes, 40.9%), with 27 of the latter genes clustered in consensus100 module 9 (Fig. 3).

272 Most predicted interactions were between genes in the same consensus module, with the majority  
273 occurring within module 3 and involving MIKC-MADS box TFs, suggesting a closely coordinated  
274 network during spikelet meristem and terminal spikelet formation (Fig. 3). Among the genes with the  
275 highest betweenness centrality, a measure of each gene's importance in the overall network, were *AGL6-*  
276 *A1* and *AGL6-B1* which were predicted to interact with 31 other TFs in the network, including 13 MIKC-  
277 MADS genes such as *PI-1*, *SEP3-1*, *AP3-1*, *SEP1-1* and *AG1* (Fig. 3). Interaction strengths implicated a  
278 role for *AG-D1* as a regulatory hub with strong incoming interactions from other MIKC-MADS-box  
279 genes from the *SEP1*, *SEP3*, *AG*, *PI*, and *AP3* subclades, as well as outgoing interactions with genes such  
280 as the LOFSEP MIKC-MADS box TF *SEP1-1* (Fig. 3). The BES1 TF *BES1/BZR1 HOMOLOG 2-like* had  
281 high betweenness centrality and was predicted to have outgoing interactions with MIKC-MADS, Trihelix  
282 and HD-ZIP TFs (Fig. 3).

283 Cross-module interactions included 16 outgoing edges from module 3 to module 1, including six outgoing  
284 interactions to a PCF-type TCP TF (Fig. 3). Although only four TFs from module 5 were assembled in  
285 the network, they included *SEP1-A3* and a C2H2 TF with ten incoming interactions from module 3  
286 including *AGL6-B1*, *BES1/BZR1 HOMOLOG 2-like* and *AG-D1* (Fig. 3).

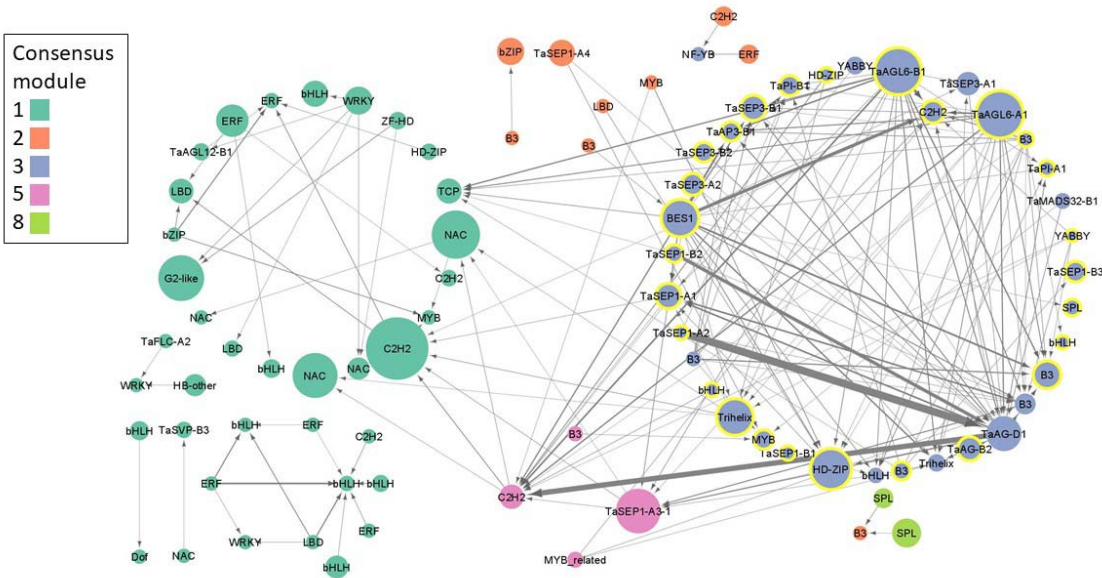

287  
288 **Figure 3:** Causal structural inference prediction of interacting transcription factors, filtered for edge  
289 weight  $\geq 0.03$ . Nodes (genes) are colored by their consensus network modules, and consensus100 module  
290 9 genes are highlighted with a yellow border. Node diameter is scaled to betweenness centrality to  
291 indicate its importance within the network. Directional interactions are indicated by arrows and width is  
292 scaled to predicted interaction strength.

293

### 294 *Integrating transcriptomics to prioritize candidate genes underlying natural variation*

295 The consensus network includes 4,637 high confidence homoeologous gene pairs, the majority of which  
296 (3,636, 78.4 %) clustered either in the same module, or in modules with highly similar expression profiles



297 (Supplementary data 7). We hypothesized that homoeologous genes clustering in different modules may  
 298 have divergent expression profiles resulting from natural variation in one homoeolog. Of these 1,001  
 299 divergently expressed gene pairs, 221 encoded TFs, including *VRN1* (where the dominant *VRN-A1* spring  
 300 allele is expressed at an earlier stage of inflorescence development compared to the wild-type *VRN-B1*  
 301 allele), *RHT1* (where the *Rht-B1b* semi-dwarfing allele is more highly expressed in the vegetative  
 302 meristem than *RHT-A1*), and *TEOSINTE BRANCHED 1* (*TB1*, where *TB-B1* expression is maintained at  
 303 higher levels than *TB-A1* during terminal spikelet formation, Figure 4A).

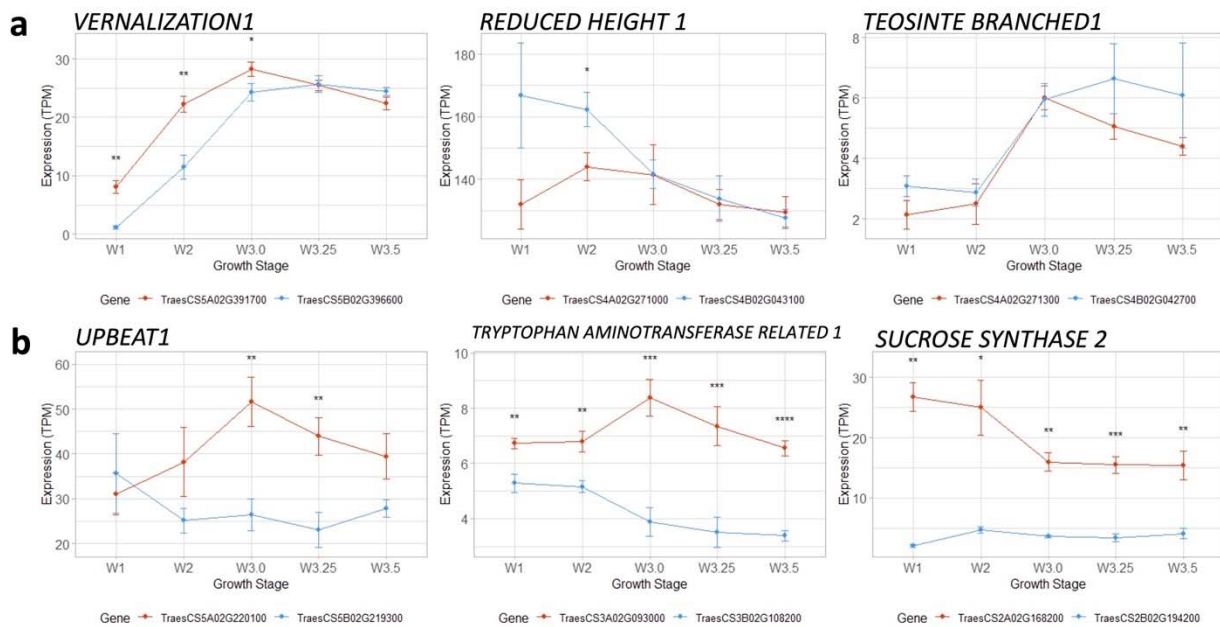

304  
 305 **Figure 4:** Divergent expression of homoeologous gene pairs during inflorescence development.  
 306 Expression profiles of (A) Characterized domestication and adaptation alleles and (B) Genes close to  
 307 QTL for spike architecture or grain size. Expression values are in TPM  $\pm$  standard error. A-genome  
 308 homoeologs are in orange, B-genome homoeologs are in blue. Paired t-tests were used to indicate  
 309 differences between homoeolog expression at each time point, *P* values < 0.05 (\*), 0.01 (\*\*), 0.001 (\*\*\*),  
 310 0.0001 (\*\*\*\*).

311

312 Each of the three genes from Fig. 4A lies within 250 kb of a QTL for either grain number or grain size  
313 (Supplementary data 7), so we hypothesized that other differentially expressed homoeologs located close  
314 to a yield-component QTL might point to natural variation for yield traits in wheat. For example,  
315 *UPBEAT-A1* is upregulated at the double ridge stage to a much greater degree than *UPBEAT-B1* (Fig.  
316 4B), is close to a QTL for TKW, and encodes an ortholog of a bHLH TF that regulates cell proliferation  
317 in *Arabidopsis*<sup>36</sup>. Similarly, *TRYPTOPHAN AMINOTRANSFERASE RELATED-A1 (TAR-A1)* is also  
318 upregulated at the double ridge stage compared to *TAR-B1* (Fig. 4B) and is proximal to a QTL for grain  
319 yield (Supplementary data 7). These genes encode enzymes in the IAA biosynthesis pathway and their  
320 overexpression has previously been shown to modify inflorescence development in wheat<sup>37</sup>. Co-  
321 expression networks and observations from meta-analysis are available for developing hypotheses on  
322 inflorescence development (Supplementary data 7).

#### 323 *Identification of CLE/WOX genes expressed during wheat inflorescence development*

324 To identify members of the conserved CLAVATA-WUSCHEL pathway that may regulate stem cell  
325 maintenance in wheat spike meristems, the expression profiles of genes encoding WOX TFs and *CLE*  
326 peptides were analyzed. Of 29 WOX TFs, 28 were expressed during early inflorescence development and  
327 11 were both significantly differentially expressed during the time course and exhibited a spike-specific  
328 expression profile (Fig. 5A). Two orthologs of *OsWOX4* were co-expressed in module 1 with rapid down-  
329 regulation before transition to the inflorescence meristem, suggesting they may play a role in vegetative  
330 meristem maintenance but not in inflorescence development. Seven *WOX* genes clustered in module 2,  
331 characterized by rising expression during inflorescence development, including the orthologs of *AtWUS*  
332 (*TaWUSa* and *b*). The homoeologues *TaWOX2a* and *2b* are both associated with variation in spikelet  
333 number and are clustered into separate co-expression modules (Supplementary data 7).  
334 Of the 64 *CLE* genes, 35 were expressed during inflorescence development and just nine were  
335 differentially expressed across the time course (Fig. 5B). Three wheat genes orthologous to *OsFON2/4*



336 (putatively *TaCLV3*, *TraesCS2A02G329300* and *TraesCS2B02G353000*) exhibit spike-dominant DR-  
 337 peaking expression profiles.

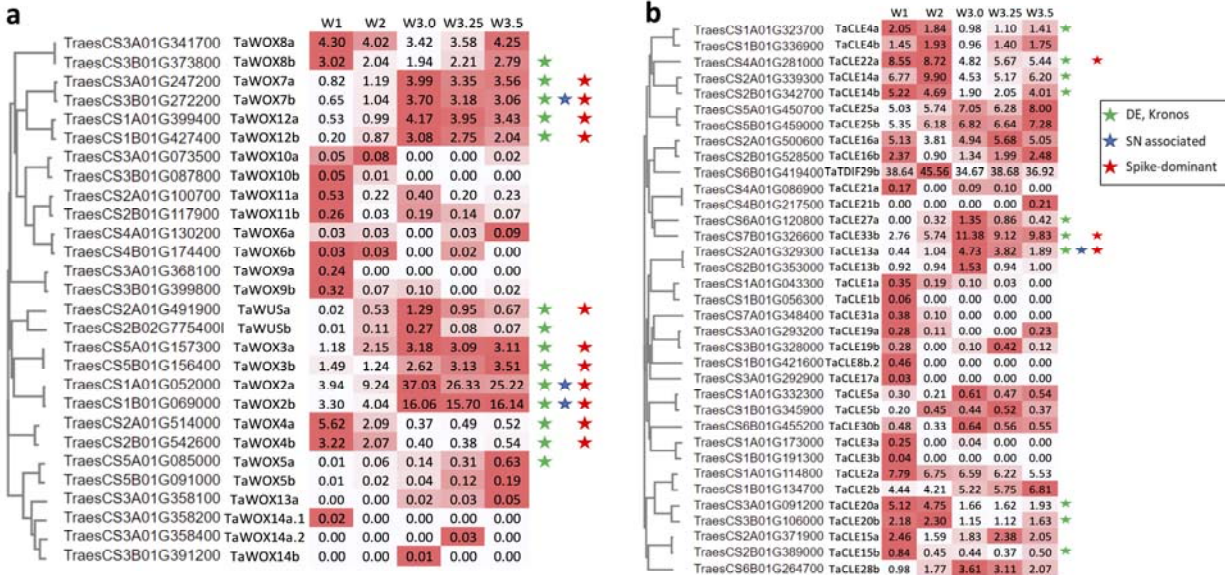

338  
 339 **Figure 5:** Expression profiles of WOX TFs (A) and CLE peptides (B) during early inflorescence  
 340 development. Stars indicate additional evidence of a possible role in spike regulation (green = differential  
 341 expression in ‘Kronos’ inflorescence, blue = associated with variation in spikelet number, red = spike-  
 342 dominant expression profile). Heatmaps show expression (TPM) relative to each gene’s minimum and  
 343 maximum expression. Only genes with TPM  $\geq$  0.05 are shown.

344

## 345 DISCUSSION

346 Temporal transcriptomic datasets can help to characterize the regulatory networks controlling the  
 347 development of complex organs such as the wheat inflorescence. One strategy to reduce spurious co-  
 348 clustering of genes is to assemble a consensus co-expression network using a matrix of co-clustering  
 349 frequencies from multiple independent networks, each assembled with randomized parameters and gene  
 350 selection<sup>38–40</sup>. Co-expression networks have been successfully applied to unravel gene function in yeast

351 (*Saccharomyces cerevisiae*), floral and fruit developmental pathways in strawberry (*Fragaria vesca*), and  
352 regulatory networks underlying leaf development in maize (*Zea mays*)<sup>39–41</sup>. In the current study, this  
353 approach generated a consensus network with a larger number of modules with improved intramodular  
354 connectivity compared to a standard WGCNA network (Fig. 2A). A further refinement to screen for  
355 genes co-clustering in every network assembly that they were both included revealed a consensus100  
356 module 9 of 167 genes that likely contribute to spikelet meristem and terminal spikelet formation (Fig.  
357 S3), indicating that consensus networks can help improve the accuracy of co-expression predictions and  
358 module assignment.

359  
360 Beyond co-expression profiles, context-specific gene regulatory networks provide information on the  
361 centrality of each gene (a measure of its importance to the flow of information through a network), as  
362 well as the strength and directionality of interactions between individual genes<sup>42</sup>. This network predicts  
363 that the MIKC-MADS box TF *AGL6* is a critical gene in inflorescence development regulatory networks,  
364 and functions together with MIKC-MADS TFs from the PI and SEP subclades (Fig. 3). This is consistent  
365 with its role in rice, where *AGL6* functions as a cofactor with A, B, C, and D class proteins during floral  
366 development, as well as in wheat, where it interacts with ABCDE proteins, likely as a bridge in complex  
367 protein-protein interactions to regulate whorl development<sup>43–45</sup>. This network also revealed novel  
368 candidate genes for future characterization studies. For example, the *BES1* TF *BES1/BZR1 HOMOLOG*  
369 *2-like* is predicted to interact with several TFs, including two HD-ZIP TFs with homology to *HvVRS1*,  
370 suggesting a role for brassinosteroid signaling in wheat inflorescence development.

371  
372 During the inflorescence development time course in tetraploid Kronos presented here, 43.1% of genes  
373 were expressed in at least one timepoint, comparable to the 40.2% and 42.5% of genes expressed in  
374 similar inflorescence development time courses in the hexaploid wheat genotypes ‘Chinese Spring’ and

375 'Kenong 9204' when these reads were reanalyzed using the same mapping parameters and reference  
376 genome<sup>24,25</sup>. Of these genes, 3,682 exhibited spike-dominant expression profiles ( $\tau > 0.9$ ). Among these  
377 genes were seven of ten SRS TFs, including the wheat ortholog of *six-rowed spike 2* (*HvVRS2*) that  
378 modulates hormone activity in the developing barley spike<sup>46</sup>. Its expression profile in wheat, coupled  
379 with its association with spikelet number in an earlier study<sup>26</sup>, suggests it plays a conserved role in wheat  
380 inflorescence development. It would also be interesting to characterize the function of four other SRS TFs  
381 that exhibit spike-specific expression profiles peaking towards terminal spikelet formation  
382 (Supplementary data 7). Ten of fifteen GRF TFs were expressed predominantly in spike tissues, including  
383 *TaGRF4* which improves regeneration efficiency in tissue culture when co-expressed with GIF cofactors  
384<sup>47</sup>. The broadly similar, spike-specific expression profiles of genes in this family suggest other members  
385 may also contribute to meristem differentiation and inflorescence development (Supplementary data 7).

386

387 A subset of *WOX* TFs and *CLE* peptides exhibited dynamic and spike-dominant expression profiles  
388 across the time course, consistent with the differential regulation of *OsWUS*, *OsWOX3*, *OsWOX4*, and  
389 *OsWOX12* during panicle development in rice<sup>48</sup>. The overexpression of *TaWOX5* (named *TaWOX9* in the  
390 current study) enhances wheat transformation and callus regeneration efficiency<sup>49</sup>. Several other *WOX*  
391 TFs are co-clustered with this gene and exhibit similar expression profiles in the wheat inflorescence (Fig.  
392 5), suggesting they may also be candidates to enhance regeneration efficiency (Fig. 5). Among *CLE*  
393 peptides, *TaCLV3* was negatively associated with spikelet number in a set of Chinese wheat landraces<sup>26</sup>,  
394 consistent with its proposed role as a negative regulator of SAM size and activity in rice and maize<sup>50,51</sup>.

395

396 Analyses of principal components and co-expression profiles indicate that the transition from the  
397 vegetative meristem to the double ridge stage is associated with major reprogramming of the wheat  
398 transcriptome (Fig. 1), consistent with an earlier study<sup>25</sup>. Several TF families were enriched in module 1,  
399 characterized by high expression in the vegetative meristem before rapid downregulation after the double

400 ridge stage, including eight of the nine RAV TFs in the consensus network. In Arabidopsis, the RAV  
401 genes *TEMPRANILLO1* (*TEM1*) and *TEM2* repress *FT* to prevent precocious flowering<sup>52,53</sup>. In rice, the  
402 *TEM* orthologs *OsRAV8* and *OsRAV9* bind the promoters of *OsMADS14* and *Hd3a* to suppress the floral  
403 transition, indicating this function is conserved in monocots<sup>54</sup>. The rapid downregulation of the wheat  
404 orthologs of these genes before double ridge formation, as well as homologs of *OsRAV11* and *OsRAV12*  
405 that act in reproductive patterning in rice<sup>54</sup>, suggests this family may act as local repressors of meristem  
406 identity genes in the developing wheat spike.

407 There were also 26 TCP TFs clustered in module 1, including *TaTCP-A9* and *TaTCP-B9*, negative  
408 regulators of spikelet number and grain size in durum wheat<sup>55</sup>. It is likely that other members of the TCP  
409 TF family also play roles as negative regulators of grain development. For example, *TaTCP-A17* and -  
410 *B17* are both downregulated during inflorescence development, are within 250 kbp of QTL for grain size,  
411 and are orthologous to genes associated with spikelet number variation in rice (Supplementary data 7).  
412 Eight TCP TFs clustered in different modules and were most highly expressed during spikelet meristem  
413 formation, including *TEOSINTE BRANCHED 1*, which integrates photoperiod signals to regulate spike  
414 architecture in a dosage-dependent manner<sup>56</sup>, and a paralogous copy on chromosome 5B, *BRANCHED*  
415 *AND INDETERMINATE SPIKE*, that regulates spike architecture in barley<sup>57</sup>. Four other uncharacterized  
416 TCP TFs with homology to *RETARDED PALEA1* exhibit spike-dominant expression profiles and would  
417 be promising candidates to characterize their role in inflorescence development in wheat (Supplementary  
418 data 7).

419  
420 Although association and linkage mapping studies in wheat have described hundreds of QTL for  
421 agronomic traits, relatively few causative genes have been cloned and validated<sup>7</sup>. Transcriptomic data  
422 can help prioritize candidate gene selection within a mapping interval based on spatial or temporal  
423 expression profiles<sup>58</sup>. Furthermore, changes in transcription may indicate the presence of dominant or  
424 semi-dominant gain-of-function variants in *cis*-regulatory elements or of structural variation that confer

425 changes in phenotype through modified expression profiles. Because of the functional redundancy of the  
426 polyploid wheat genome, such variants underlie the majority of cloned genes to date <sup>59</sup>, including  
427 domestication alleles of *PPD1*, *VRN1* and *RHT1*, which clustered in different co-expression modules to  
428 their wild-type homoeologous allele (Fig. 4). Such divergent expression profiles, especially for those  
429 genes in close proximity to QTL for traits relating to grain number and grain size, might be strong  
430 candidates for allele mining to explore the extent of natural variation in wheat germplasm collections, and  
431 to engineer novel variation by targeted editing of *cis*-regulatory regions <sup>60</sup>.

432

### 433 *Conclusions*

434 Consensus and gene regulatory networks provide the means to analyze temporal transcriptomic datasets  
435 as a complementary approach to characterize functional pathways underlying wheat inflorescence  
436 development. The incorporation of higher resolution datasets at both the spatial and temporal levels  
437 within meristem tissues will build on these findings <sup>29</sup>. Although reverse genetics will be required to  
438 validate the hypotheses generated from *in silico* network analyses, the integration of functional datasets  
439 from wheat and related species facilitates the identification of critical regulators <sup>61</sup>. An improved  
440 understanding of the regulation of inflorescence development will help breeders combine superior alleles  
441 to drive increased grain number.

442

## 443 **MATERIALS AND METHODS**

### 444 *Plant materials and growth conditions*

445 All experiments were performed in the tetraploid *Triticum turgidum* L. subsp. *durum* (Desf.) var. Kronos  
446 (genomes AABB). Kronos has a spring growth habit conferred by a *VRN-A1* allele containing a deletion  
447 in intron 1 and carries the *Ppd-A1a* allele that confers reduced sensitivity to photoperiod <sup>62,63</sup>. Plants were

448 grown in controlled conditions in PGR15 growth chambers (Conviro, Manitoba, Canada) under a long  
449 day photoperiod (16 h light/8 h dark) at 23 °C day/17 °C night temperatures and a light intensity of ~260  
450  $\mu\text{M m}^{-2} \text{ s}^{-1}$ . Developing apical meristems were harvested under a dissecting microscope using a sterile  
451 scalpel and placed immediately in liquid nitrogen. All samples were harvested within a one-hour period  
452 approximately 4 h after the lights were switched on (+/- 30 min) to account for possible differences in  
453 circadian regulation of gene expression. Approximately 20 apices were combined for each biological  
454 replicate of samples harvested at stages W1.0 (shoot apical meristem, SAM) and W2.0 (early double  
455 ridge, EDR) and approximately 12 apices for samples harvested at stages W3.0 (double ridge, DR),  
456 W3.25 (lemma primordia, LP) and W3.5 (terminal spikelet, TS)<sup>3</sup>. Four biological replicates were  
457 harvested at each timepoint.

#### 458 *RNA-seq library construction and sequencing*

459 Tissues were ground into a fine powder in liquid nitrogen and total RNA was extracted using the  
460 Spectrum™ Plant Total RNA kit (Sigma-Aldrich, St. Louis, MO). Sequencing libraries were produced  
461 using the TruSeq RNA Sample Preparation kit v2 (Illumina, San Diego, CA), according to the  
462 manufacturer's instructions. Library quality was determined using a high-sensitivity DNA chip run on a  
463 2100 Bioanalyzer (Agilent Technologies, Santa Clara, CA). Libraries were barcoded to allow  
464 multiplexing and all samples were sequenced using the 100 bp single read module across two lanes of a  
465 HiSeq3000 sequencer at the UC Davis Genome Center.

#### 466 *RNA-seq data processing*

467 'Kronos' RNA-seq reads were trimmed and checked for quality Phred scores above 30 using Fastp  
468 v0.20.1<sup>64</sup>. Trimmed reads were aligned to the IWGSC RefSeq v1.0 genome assembly consisting of A and  
469 B chromosome pseudomolecules and unanchored (U) scaffolds not assigned to any chromosome (ABU)  
470 using STAR 2.7.5 aligner (outFilterMismatchNoverReadLmax = 0.04, alignIntronMax = 10,000)<sup>20,65</sup>.  
471 Only uniquely mapped reads were retained for expression analysis. Transcript levels were quantified by



472 featureCounts using 190,391 gene models from the ABU IWGSC RefSeq v1.1 annotations<sup>28,66</sup> and  
473 converted to Transcripts Per Million (TPM) values using a custom python script available from  
474 [https://github.com/cvanges/spike\\_development/](https://github.com/cvanges/spike_development/) (Supplementary data 1).

475 Raw RNA-seq reads for ‘Kenong9204’ and ‘Chinese Spring’ inflorescence development datasets were  
476 obtained from BioProjects PRJNA325489 and PRJNA383677<sup>24,25</sup>. RNA-seq reads were processed with  
477 Fastp as described above and aligned to the hexaploid ABDU RefSeq v1.0 genome assembly using the  
478 same methods and parameters. Transcript quantification and TPM were determined as above using the  
479 full ABDU IWGSC RefSeq v1.1 annotations.

480 RNA-seq reads and raw count data for each sample is available from NCBI Gene Expression Omnibus  
481 under the accession GSE193126 (<https://www.ncbi.nlm.nih.gov/geo/>).

#### 482 *Transcription factors*

483 There were 3,838 ABU gene models annotated as transcription factors that were grouped into 65 TF  
484 families per IWGSC v1.1 annotations<sup>28</sup>. The following families were consolidated: “AP2” and  
485 “APETALA2”, “bHLH” and “HRT-like”, “MADS” and “MADS1”, “NFYB” and “NF-YB”, “NFYC”  
486 and “NF-YC”, and “SBP” and “SPL”, as well as “MADS2” and “MIKC”, which were consolidated into  
487 “MIKC-MADS”. After consolidation, there were 59 TF families. A previous study described the  
488 annotation of 201 MIKC-MADS box genes placed into 15 subclades<sup>17</sup>. There were 30 MIKC  
489 transcription factors on the A and B genomes absent from the IWGSC TF list, which were added to this  
490 family. Investigations of the *CLE* and *WOX* gene families were based on the naming reported in Li et al.,  
491 2019b and Li et al. 2020b, with the addition of *TaWUSb* (*TraesCS2B02G775400LC*) to the *WOX* family,  
492 which was absent from these studies. In total, 3,861 TFs were included in this study (Supplementary data  
493 2).

#### 494 *Spike-dominant expression analysis*

495 Expression data (TPMs) for two developmental studies were obtained from the Grassroots Data  
496 Repository ([https://opendata.earlham.ac.uk/wheat/under\\_license/toronto/Ramirez-Gonzalez\\_et\\_al\\_2018-](https://opendata.earlham.ac.uk/wheat/under_license/toronto/Ramirez-Gonzalez_et_al_2018-06025-Transcriptome-Landscape/expvip/RefSeq_1.0/ByTranscript/)  
497 [06025-Transcriptome-Landscape/expvip/RefSeq\\_1.0/ByTranscript/](https://opendata.earlham.ac.uk/wheat/under_license/toronto/Ramirez-Gonzalez_et_al_2018-06025-Transcriptome-Landscape/expvip/RefSeq_1.0/ByTranscript/))<sup>27,28</sup>. The first dataset, in ‘Chinese  
498 Spring’, included samples from five tissue types at three timepoints (mean of two biological replicates)  
499 for 15 total tissue/stages<sup>27</sup>. A second dataset from the variety ‘Azhurnaya’ comprised 209 unreplicated  
500 samples grouped into 22 “intermediate tissue” groups of various sizes<sup>28</sup>. Twelve samples overlapping  
501 with ‘Kronos’ spike samples were removed (tissue groups “coleoptile”, “stem axis”, and “shoot apical  
502 meristem”). For early spike tissue specificity analyses, the mean TPM expression of 15 ‘Chinese Spring’  
503 tissues (n = 2) or the mean of 22 ‘Azhurnaya’ tissues (n ranging from 3 - 30) were compared to the  
504 ‘Kronos’ sampling stage with the highest mean expression (n = 4). Comparisons were made using the Tau  
505 ( $\tau$ ) tissue specificity metric where  $\tau = 0$  indicates ubiquitous expression and  $\tau = 1$  indicates tissue specific  
506 expression<sup>67,68</sup>. A custom R script was used to calculate tissue specificity and is available at  
507 [github.com/cvanges/spike\\_development](https://github.com/cvanges/spike_development). Genes which were expressed predominantly in ‘Kronos’  
508 inflorescence tissues ( $\tau > 0.9$ ) were defined ‘spike-dominant’ whereas genes only expressed in ‘Kronos’  
509 inflorescence tissues ( $\tau = 1$ ) were defined ‘spike-specific’ (Supplementary data 3).

#### 510 *Principal Component Analysis (PCA), Differential Expression, and GO enrichment*

511 PCA was performed in R using `prcomp` in the `r/stats` package v2.6.2 including all replications for each  
512 time point. PCA plots were generated with `ggplot2` v3.3.2. Whole transcriptome PCA used read counts  
513 from all expressed gene models (n = 82,019) and TF PCA used expression of 2,874 expressed TFs.  
514 Randomized PCA distribution (Fig. S1) used independent random subsampling of 2,874 expressed genes  
515 without replacement. Principle component percent variation explained and eigenvalues from `prcomp` were  
516 used for comparisons between whole transcriptome PCA and TF-only PCA.  
517 Pairwise differential expression was determined using both `EdgeR` v3.24.3 and `DESeq2` v1.22.2 for  
518 robustness<sup>69,70</sup>. Pairwise comparisons between consecutive timepoints were done using raw read counts  
519 for four biological replicates at each stage. Benjamin-Hochberg FDR adjusted  $P$ -values  $\leq 0.01$  was used



520 as a stringent DE cut-off for both tools. Only genes DE using both tools were classified as pairwise DEGs  
521 (Supplementary data 5). Differential expression of ‘Chinese Spring’ and ‘Kenong9204’ inflorescence  
522 development datasets was also determined with raw read counts and EdgeR and DESeq2 using the same  
523 method as for the ‘Kronos’ dataset. Adjustments to DE tests were made to compare all four timepoints (6  
524 pairwise comparisons) with two biological replicates in ‘Chinese Spring’ as well as the six timepoints (15  
525 pairwise comparisons) with two biological replicates in the ‘Kenong9204’ datasets. For network analyses,  
526 a second DE test was included which reinforced longitudinal DE determination, an impulse model  
527 (ImpulseDE2, <https://github.com/YosefLab/ImpulseDE2>) was used for ‘Kronos’ data<sup>71,72</sup>. Raw counts  
528 were used with default parameters and genes with Benjamin-Hochberg FDR adjusted  $P$ -values  $\leq 0.05$   
529 considered differentially expressed. Functional annotation to generate GO terms for each high-confidence  
530 and low-confidence gene in the IWGSC RefSeq v1.1 genome was performed as described previously<sup>73</sup>.

#### 531 *Standard and consensus WGCNA network construction*

532 Genes identified using pairwise differential expression (EdgeR and DESeq2) and ImpulseDE2 (22,566  
533 genes total) were used for co-expression analyses. A standard co-expression network was built using the  
534 R package WGCNA v1.66 with the parameters: power = 20, networkType = signed, minimum module  
535 size = 30, and mergecutheight = 0.25<sup>74</sup> (Supplementary data 7). Parallel coordinate plots were produced  
536 in R by normalizing raw read counts and visualized with ggparacoord (scale = ‘globalminmax’) in GGally  
537 (version1.5.0).

538 A consensus network was built using methods described in Shahan *et al.* (2018). In brief, 1,000 WGCNA  
539 runs were performed with 80% of genes randomly subsampled without replacement and random  
540 parameters for power (1, 2, 4, 8, 12, 16, 20), minModSize (40, 60, 90, 120, 150, 180, 210), and  
541 mergeCutHeight (0.15, 0.2, 0.25, 0.3). The final consensus network was built using an adjacency matrix –  
542  $\text{adj} = \text{number of times gene } i \text{ is clustered with gene } j / \text{number of times gene } i \text{ is subsampled with gene } j$  –  
543 with parameters power = 6 and minModuleSize = 30 (Supplementary data 7). The consensus100 network  
544 was built by filtering the adjacency network for  $\text{adj} = 1$  prior to network construction. Along with module

545 assignments, we used the WGCNA package to find the connectivity of each gene with co-clustered genes  
546 (`intramodularConnectivity.fromExpr()`) and summarized module expression patterns  
547 (`moduleEigengenes()`). Python and R scripts for creating the adjacency matrix and consensus network are  
548 available at [https://github.com/cvanges/spike\\_development](https://github.com/cvanges/spike_development). The Bioconductor package `GeneOverlap` was  
549 used to determine the overlap of module assignments between consensus and standard networks  
550 (<http://shenlab-sinai.github.io/shenlab-sinai/>)<sup>75</sup>.

### 551 *Causal Structure Inference Network*

552 Expression data (TPM) for 970 transcription factors retained in the consensus100 network was used to  
553 build a gene regulatory network using the Causal Structure Inference algorithm<sup>42</sup>. Network construction  
554 used CSI in Cyverse with default parameters<sup>42</sup>

### 555 *Conversion of wheat, rice, and barley gene IDs*

556 Genes associated with wheat and rice spikelet number described in Wang et al., 2017b were identified  
557 from a previous set of annotated wheat gene models ([ftp://ftp.ensemblgenomes.org/pub/plants/release-](ftp://ftp.ensemblgenomes.org/pub/plants/release-28/)  
558 [28/](ftp://ftp.ensemblgenomes.org/pub/plants/release-28/)). To identify the corresponding IWGSC RefSeq v1.1 gene ID, each gene model coding sequence was  
559 extracted and used as a query in BLASTn searches against the IWGSCv1.1 ABU genome. Homologous  
560 gene pairs with > 99% identity to each query were considered spikelet number associated genes. Two  
561 previous studies reported genes DE during *H. vulgare* inflorescence development using IBSC\_v2  
562 annotations<sup>76,77</sup>. Each barley gene model coding sequence was extracted and used as a query in BLASTn  
563 searches against the IWGSCv1.1 ABU wheat genome. Genes with percent identity > 90% were retained  
564 and considered orthologs of barley DEGs (HvDE).

### 565 *Enrichment analysis*

566 Enrichment and depletion of genes among modules or DEG lists was determined using the cumulative  
567 distribution function of the hypergeometric distribution ([systems.crump.ucla.edu/hypergeometric/](https://systems.crump.ucla.edu/hypergeometric/)).

568 *QTL proximity and definition of homoeologous pairs*

569 Using a previously published meta-analysis of yield component QTL studies, we searched the  
570 IWGSCv1.1 genome for expressed genes in our timecourse within 500 kbp of 428 loci associated with  
571 yield component traits (kernel number per spike, thousand kernel weight, spikelet number)<sup>7</sup>.  
572 Homoeologous gene pairs reported from Ramírez-González et al., (2018)<sup>28</sup> were used to determine co-  
573 expressed homoeologs.

574 **References**

- 575 1. Ray, D. K., Mueller, N. D., West, P. C. & Foley, J. A. Yield trends are insufficient to double  
576 global crop production by 2050. *PLoS One* **8**, e66428 (2013).
- 577 2. Brinton, J. & Uauy, C. A reductionist approach to dissecting grain weight and yield in wheat. *J.*  
578 *Integr. Plant Biol.* **61**, 337–358 (2019).
- 579 3. Waddington, S. R., Cartwright, P. M. & Wall, P. C. A quantitative scale of spike initial and pistil  
580 development in barley and wheat. *Ann. Bot.* **Vol 51**, 119–130 (1983).
- 581 4. Li, C. *et al.* Wheat *VRN1*, *FUL2* and *FUL3* play critical and redundant roles in spikelet  
582 development and spike determinacy. *Development* **146**, dev175398 (2019).
- 583 5. Bonnett, O. T. Inflorescences of maize, wheat, rye, barley, and oats: their initiation and  
584 development. *University of Illinois (Urbana-Champaign) College of Agriculture, Agricultural*  
585 *Research Center Bulletin* **721**, (1966).
- 586 6. Rawson, H. M. Spikelet number, its control and relation to yield per ear in wheat. *Aust. J. Biol.*  
587 *Sci.* **23**, 1–15 (1970).
- 588 7. Cao, S., Xu, D., Hanif, M., Xia, X. & He, Z. Genetic architecture underpinning yield component  
589 traits in wheat. *Theor. Appl. Genet.* **133**, 1811–1823 (2020).
- 590 8. Würschum, T., Leiser, W. L., Langer, S. M., Tucker, M. R. & Longin, C. F. H. Phenotypic and  
591 genetic analysis of spike and kernel characteristics in wheat reveals long-term genetic trends of  
592 grain yield components. *Theor. Appl. Genet.* **131**, 2071–2084 (2018).
- 593 9. Somssich, M., Je, B. il, Simon, R. & Jackson, D. CLAVATA-WUSCHEL signaling in the shoot  
594 meristem. *Development* **143**, 3238–3248 (2016).
- 595 10. Fletcher, J. C. The CLV-WUS stem cell signaling pathway: a roadmap to crop yield optimization.  
596 *Plants* **7**, 87 (2018).
- 597 11. Rodríguez-Leal, D., Lemmon, Z. H., Man, J., Bartlett, M. E. & Lippman, Z. B. Engineering  
598 quantitative trait variation for crop improvement by genome editing. *Cell* **171**, 470–480 (2017).
- 599 12. Chen, Z. *et al.* Structural variation at the maize *WUSCHEL1* locus alters stem cell organization in  
600 inflorescences. *Nat. Comms.* **12**, 1–12 (2021).
- 601 13. Li, Z. *et al.* Identification and functional analysis of the CLAVATA3/EMBRYO  
602 SURROUNDING REGION (CLE) gene family in wheat. *Int. J. Mol. Sci.* **20**, 4319 (2019).
- 603 14. Li, Z. *et al.* Identification of the WUSCHEL-Related Homeobox (WOX) gene family, and  
604 interaction and functional analysis of *TaWOX9* and *TaWUS* in wheat. *Int. J. Mol. Sci.* **21**, 1581  
605 (2020).
- 606 15. Honma, T. & Goto, K. Complexes of MADS-box proteins are sufficient to convert leaves into  
607 floral organs. *Nature* **409**, 525–529 (2001).
- 608 16. Theißen, G. Development of floral organ identity: Stories from the MADS house. *Curr. Op. Plant*  
609 *Biol.* **4**, 75–85 (2001).

- 610 17. Schilling, S., Kennedy, A., Pan, S., Jermiin, L. S. & Melzer, R. Genome-wide analysis of MIKC-  
611 type MADS-box genes in wheat: pervasive duplications, functional conservation and putative  
612 neofunctionalization. *New Phytol.* **225**, 511–529 (2020).
- 613 18. Li, K. *et al.* Interactions between SQUAMOSA and SHORT VEGETATIVE PHASE MADS-box  
614 proteins regulate meristem transitions during wheat spike development. *Plant Cell* **33**, 3621–3644  
615 (2021).
- 616 19. Adamski, N. M. *et al.* Ectopic expression of *Triticum polonicum* VRT-A2 underlies elongated  
617 glumes and grains in hexaploid wheat in a dosage-dependent manner. *Plant Cell* **33**, 2296–2319  
618 (2021).
- 619 20. The International Wheat Genome Sequencing Consortium (IWGSC) *et al.* Shifting the limits in  
620 wheat research and breeding using a fully annotated reference genome. *Science* **361**, eaar7191  
621 (2018).
- 622 21. Walkowiak, S. *et al.* Multiple wheat genomes reveal global variation in modern breeding. *Nature*  
623 **588**, 277–283 (2020).
- 624 22. Rao, X. & Dixon, R. A. Co-expression networks for plant biology: why and how. *Acta Biochim.*  
625 *Biophys. Sin. (Shanghai)* **51**, 981–988 (2019).
- 626 23. van den Broeck, L., Gordon, M., Inzé, D., Williams, C. & Sozzani, R. Gene regulatory network  
627 inference: Connecting plant biology and mathematical modeling. *Front. Genet.* **11**, 457 (2020).
- 628 24. Feng, N. *et al.* Transcriptome profiling of wheat inflorescence development from spikelet  
629 initiation to floral patterning identified stage-specific regulatory genes. *Plant Phys.* **174**, 1779–  
630 1794 (2017).
- 631 25. Li, Y. *et al.* A genome-wide view of transcriptome dynamics during early spike development in  
632 bread wheat. *Sci. Rep.* **8**, 1–16 (2018).
- 633 26. Wang, Y. *et al.* Transcriptome association identifies regulators of wheat spike architecture. *Plant*  
634 *Phys.* **175**, 746–757 (2017).
- 635 27. Choulet, F. *et al.* Structural and functional partitioning of bread wheat chromosome 3B. *Science*  
636 **345**, eaar1249721 (2014).
- 637 28. Ramírez-González, R. H. *et al.* The transcriptional landscape of polyploid wheat. *Science* **361**,  
638 eaar6089 (2018).
- 639 29. Backhaus, A. E. *et al.* High expression of the MADS-box gene VRT2 increases the number of  
640 rudimentary basal spikelets in wheat. *Plant Phys.* **189**, 1536–1552 (2022).
- 641 30. Emery, J. F. *et al.* Radial patterning of *Arabidopsis* shoots by Class III HD-ZIP and KANADI  
642 genes. *Curr. Biol.* **13**, 1768–1774 (2003).
- 643 31. Du, D. *et al.* FRIZZY PANICLE defines a regulatory hub for simultaneously controlling spikelet  
644 formation and awn elongation in bread wheat. *New Phytol.* **231**, 814–833 (2021).
- 645 32. Shaw, L. M. *et al.* FLOWERING LOCUS T2 regulates spike development and fertility in  
646 temperate cereals. *J. Exp. Bot.* **70**, 193–204 (2019).

- 647 33. Debernardi, J. M., Greenwood, J. R., Jean Finnegan, E., Jernstedt, J. & Dubcovsky, J.  
648 APETALA 2-like genes *AP2L2* and *Q* specify lemma identity and axillary floral meristem  
649 development in wheat. *Plant J.* **101**, 171–187 (2020).
- 650 34. Kuzay, S. *et al.* *WAPO-A1* is the causal gene of the 7AL QTL for spikelet number per spike in  
651 wheat. *PLoS Genet.* **18**, e1009747 (2022).
- 652 35. Dong, Z. *et al.* Ideal crop plant architecture is mediated by *tassels replace upper ears1*, a  
653 BTB/POZ ankyrin repeat gene directly targeted by TEOSINTE BRANCHED1. *Proc. Natl. Acad.*  
654 *Sci. USA* **114**, E8656–E8664 (2017).
- 655 36. Tsukagoshi, H., Busch, W. & Benfey, P. N. Transcriptional regulation of ROS controls transition  
656 from proliferation to differentiation in the root. *Cell* **143**, 606–616 (2010).
- 657 37. Shao, A. *et al.* The auxin biosynthetic *TRYPTOPHAN AMINOTRANSFERASE RELATED*  
658 *TaTAR2.1-3A* increases grain yield of wheat. *Plant Phys.* **174**, 2274–2288 (2017).
- 659 38. Monti, S. *et al.* Consensus clustering: A resampling-based method for class discovery and  
660 visualization of gene expression microarray data. *Mach. Learn.* **52**, 91–118 (2003).
- 661 39. Wu, L. F. *et al.* Large-scale prediction of *Saccharomyces cerevisiae* gene function using  
662 overlapping transcriptional clusters. *Nat. Genet.* **31**, 255–265 (2002).
- 663 40. Shahan, R. *et al.* Consensus coexpression network analysis identifies key regulators of flower and  
664 fruit development in wild strawberry. *Plant Phys.* **178**, 202–216 (2018).
- 665 41. Miculan, M. *et al.* A forward genetics approach integrating genome-wide association study and  
666 expression quantitative trait locus mapping to dissect leaf development in maize (*Zea mays*). *Plant*  
667 *J.* **107**, 1056–1071 (2021).
- 668 42. Penfold, C. A. & Wild, D. L. How to infer gene networks from expression profiles, revisited.  
669 *Interface Focus* **1**, 857–870 (2011).
- 670 43. Su, Y. *et al.* Wheat AGAMOUS like 6 transcription factors function in stamen development by  
671 regulating the expression of *TaAPETALA3*. *Development* **146**, (2019).
- 672 44. Li, H. *et al.* Rice *MADS6* interacts with the floral homeotic genes *SUPERWOMANI*, *MADS3*,  
673 *MADS58*, *MADS13*, and *DROOPING LEAF* in specifying floral organ identities and meristem  
674 fate. *Plant Cell* **23**, 2536–2552 (2011).
- 675 45. Kong, X. *et al.* The wheat *AGL6*-like MADS-box gene is a master regulator for floral organ  
676 identity and a target for spikelet meristem development manipulation. *Plant Biotech. J.* **20**, 75–88  
677 (2022).
- 678 46. Youssef, H. M. *et al.* *VRS2* regulates hormone-mediated inflorescence patterning in barley. *Nat.*  
679 *Genet.* **49**, 157–161 (2016).
- 680 47. Debernardi, J. M. *et al.* A GRF–GIF chimeric protein improves the regeneration efficiency of  
681 transgenic plants. *Nat. Biotech.* **38**, 1274–1279 (2020).
- 682 48. Cheng, S., Huang, Y., Zhu, N. & Zhao, Y. The rice *WUSCHEL*-related homeobox genes are  
683 involved in reproductive organ development, hormone signaling and abiotic stress response. *Gene*  
684 **549**, 266–274 (2014).

- 685 49. Wang, K. *et al.* The gene *TaWOX5* overcomes genotype dependency in wheat genetic  
686 transformation. *Nat. Plants* **8**, 110–117 (2022).
- 687 50. Chu, H. *et al.* The *FLORAL ORGAN NUMBER4* gene encoding a putative ortholog of Arabidopsis  
688 *CLAVATA3* regulates apical meristem size in rice. *Plant Phys.* **142**, 1039–1052 (2006).
- 689 51. Bommert, P., Je, B. il, Goldshmidt, A. & Jackson, D. The maize *Ga* gene *COMPACT PLANT2*  
690 functions in *CLAVATA* signalling to control shoot meristem size. *Nature* **502**, 555–558 (2013).
- 691 52. Hu, H. *et al.* *TEM1* combinatorially binds to *FLOWERING LOCUS T* and recruits a Polycomb  
692 factor to repress the floral transition in *Arabidopsis*. *Proc. Natl. Acad. Sci. USA* **118**, e2103895118  
693 (2021).
- 694 53. Castillejo, C. & Pelaz, S. The balance between *CONSTANS* and *TEMPRANILLO* activities  
695 determines *FT* expression to trigger flowering. *Curr. Biol.* **18**, 1338–1343 (2008).
- 696 54. Osnato, M., Matias-Hernandez, L., Aguilar-Jaramillo, A. E., Kater, M. M. & Pelaza, S. Genes of  
697 the *RAV* family control heading date and carpel development in rice. *Plant Phys.* **183**, 1663–1680  
698 (2020).
- 699 55. Zhao, J. *et al.* Genome-wide identification and expression profiling of the *TCP* family genes in  
700 spike and grain development of wheat (*Triticum aestivum* L.). *Front. Plant Sci.* **9**, (2018).
- 701 56. Dixon, L. E. *et al.* *TEOSINTE BRANCHED1* regulates inflorescence architecture and development  
702 in bread wheat (*Triticum aestivum*). *Plant Cell* **30**, 563–581 (2018).
- 703 57. Shang, Y. *et al.* A *CYC/TB1*-type *TCP* transcription factor controls spikelet meristem identity in  
704 barley. *J. Exp. Bot.* **71**, 7118–7131 (2020).
- 705 58. Yang, Y. *et al.* Large-scale integration of meta-QTL and genome-wide association study discovers  
706 the genomic regions and candidate genes for yield and yield-related traits in bread wheat. *Theor.*  
707 *Appl. Genet.* **134**, 3083–3109 (2021).
- 708 59. Gaurav, K. *et al.* Population genomic analysis of *Aegilops tauschii* identifies targets for bread  
709 wheat improvement. *Nat. Biotech.* **40**, 422–431 (2022).
- 710 60. Swinnen, G., Goossens, A. & Pauwels, L. Lessons from domestication: Targeting *cis*-regulatory  
711 elements for crop improvement. *Trends Plant Sci.* **21**, 506–515 (2016).
- 712 61. Uauy, C., Wulff, B. B. H. & Dubcovsky, J. Combining traditional mutagenesis with new high-  
713 throughput sequencing and genome editing to reveal hidden variation in polyploid wheat. *Ann.*  
714 *Rev. Genet.* **51**, 435–54 (2017).
- 715 62. Wilhelm, E. P., Turner, A. S. & Laurie, D. A. Photoperiod insensitive *Ppd-A1a* mutations in  
716 tetraploid wheat (*Triticum durum* Desf.). *Theor. Appl. Genet.* **118**, 285–294 (2008).
- 717 63. Fu, D. *et al.* Large deletions within the first intron in *VRN-1* are associated with spring growth  
718 habit in barley and wheat. *Mol. Genet. Genom.* **273**, 54–65 (2005).
- 719 64. Chen, S., Zhou, Y., Chen, Y. & Gu, J. Fastp: An ultra-fast all-in-one FASTQ preprocessor.  
720 *Bioinformatics* **34**, 884–890 (2018).
- 721 65. Dobin, A. *et al.* STAR: Ultrafast universal RNA-seq aligner. *Bioinformatics* **29**, 15–21 (2013).



- 722 66. Liao, Y., Smyth, G. K. & Shi, W. FeatureCounts: An efficient general purpose program for  
723 assigning sequence reads to genomic features. *Bioinformatics* **30**, 923–930 (2014).
- 724 67. Yanai, I. *et al.* Genome-wide midrange transcription profiles reveal expression level relationships  
725 in human tissue specification. *Bioinformatics* **21**, 650–659 (2005).
- 726 68. Kryuchkova-Mostacci, N. & Robinson-Rechavi, M. A benchmark of gene expression tissue-  
727 specificity metrics. *Brief. Bioinform.* **18**, 205–214 (2017).
- 728 69. Robinson, M. D., McCarthy, D. J. & Smyth, G. K. edgeR: A Bioconductor package for differential  
729 expression analysis of digital gene expression data. *Bioinformatics* **26**, 139–140 (2010).
- 730 70. Anders, S. & Huber, W. Differential expression analysis for sequence count data. *Genome Biol.*  
731 **11**, R106 (2010).
- 732 71. Fischer, D. S., Theis, F. J. & Yosef, N. Impulse model-based differential expression analysis of  
733 time course sequencing data. *Nucleic Acids Res.* **46**, e119 (2018).
- 734 72. Spies, D., Renz, P. F., Beyer, T. A. & Ciaudo, C. Comparative analysis of differential gene  
735 expression tools for RNA sequencing time course data. *Brief. Bioinform.* **20**, 228–298 (2019).
- 736 73. Pearce, S., Kippes, N., Chen, A., Debernardi, J. M. & Dubcovsky, J. RNA-seq studies using wheat  
737 *PHYTOCHROME B* and *PHYTOCHROME C* mutants reveal shared and specific functions in the  
738 regulation of flowering and shade-avoidance pathways. *BMC Plant Biol.* **16**, 141 (2016).
- 739 74. Langfelder, P. & Horvath, S. WGCNA: An R package for weighted correlation network analysis.  
740 *BMC Bioinform.* **9**, 1–13 (2008).
- 741 75. Shen, L. GeneOverlap: Test and visualize gene overlaps. Preprint at [http://shenlab-](http://shenlab-sinai.github.io/shenlab-sinai/)  
742 [sinai.github.io/shenlab-sinai/](http://shenlab-sinai.github.io/shenlab-sinai/) (2021).
- 743 76. Digel, B., Pankin, A. & von Korff, M. Global transcriptome profiling of developing leaf and shoot  
744 apices reveals distinct genetic and environmental control of floral transition and inflorescence  
745 development in barley. *Plant Cell* **27**, 2318–2334 (2015).
- 746 77. Liu, H. *et al.* Transcriptome profiling reveals phase-specific gene expression in the developing  
747 barley inflorescence. *Crop J.* **8**, 71–86 (2020).

748

749



750 **Acknowledgements**

751 We thank Dr. Luis de Haro for assistance in RNA-seq library preparation and Dr. Cristobal Uauy for  
752 helpful input and discussion on project design and analysis. Work in this project was funded by the  
753 International Wheat Yield Partnership Grant IWYP76.

754 **Author contributions**

755 SP and JD conceived of and designed the project. CV, JH and FT analyzed RNA-seq data. CV, SP and JD  
756 wrote the manuscript.

757

758 **Data Availability**

759 All RNA-seq data have been deposited with the Gene Expression Omnibus (GEO) database under record  
760 number GSE193126. Processed expression and gene annotation information are provided as  
761 supplementary files.

762

763 **Competing interests**

764 The authors declare no competing interests.

765

766 **Additional Information**

767 N/A

768

769 **Supplementary Files**

770 Supplementary Data 1 – Expression levels (TPM) of 82,019 genes expressed in Kronos inflorescence  
771 transcriptome.

772 Supplementary Data 2 – Expression levels (TPM) of transcription factors during inflorescence  
773 development. TF families, subclade (for MIKC-MADS box TFs) and mean expression at each timepoint.

774 Supplementary Data 3 – Genes with spike-dominant expression profiles, including Tau specificity score,  
775 annotation, and TF family.

776 Supplementary Data 4 – Significantly enriched Gene Ontology terms associated with spike-dominant  
777 genes. Results for biological processes, cellular components and molecular functions are presented  
778 separately.

779 Supplementary Data 5 – Differential expression statistics for 82,019 genes expressed during inflorescence  
780 development. FDR-adjusted *P* and log<sub>2</sub>-fold change values are provided from ImpulseDE2 and all ten  
781 pairwise comparisons (DESeq2 + EdgeR).

782 Supplementary Data 6 – Significantly enriched Gene Ontology terms associated with genes differentially  
783 expressed in pairwise comparisons between consecutive timepoints. Results for biological processes,  
784 cellular components and molecular functions are presented separately.

785 Supplementary Data 7 – Information on 22,566 genes assembled into co-expression gene networks  
786 (standard WGCNA, consensus, consensus100) module assignments, intramodular connectivity (Kw),  
787 common gene name, and supporting evidence (TaSN, OsSN, TaDE, HvDE, QTL proximity, spike-  
788 dominant).

789 Supplementary Data 8 – Significantly enriched Gene Ontology terms associated with genes in each  
790 module of the consensus network. Results for biological processes, cellular components and molecular  
791 functions are presented separately.

792 Supplementary Data 9 – Significantly enriched Gene Ontology terms associated with genes in  
793 consensus100 module 9. Results for biological processes, cellular components and molecular functions  
794 are presented separately.

795 Supplementary Data 10 – Causal Structure Inference network (separate. xgmml file, Cytoscape  
796 compatible).  
797

798 **Figure legends**

799 **Figure 1:** The early wheat inflorescence development transcriptome. (A) Sampling stages of Kronos  
800 apical meristems according to the Waddington development scale<sup>3</sup>; W1.0 – vegetative meristem, W2 –  
801 double ridge, W3.0 – glume primordium, W3.25 – lemma primordium, W3.5 – terminal spikelet. (B)  
802 Whole transcriptome and transcription factor expression principal component analysis of samples, PC1  
803 plotted on the x-axis and PC2 plotted on the y-axis. PVE = Percent Variance Explained. (C) Differentially  
804 expressed genes (DEGs) in sequential pairwise comparisons (W1 – W2, W2 – W3.0, W3.0 – W3.25,  
805 W3.25 – W3.5). The total number of genes, the number up- and down-regulated and the proportion  
806 encoding transcription factors (TF) are described. (D) Venn diagram of DEGs in each consecutive  
807 pairwise comparison from (C). Each category is shaded according to the number of sequential DEGs  
808 shared among the four comparisons.

809 **Figure 2:** Co-expression networks showing the dominant transcriptional profiles during wheat  
810 inflorescence development. (A) Histogram of intramodular connectivity scores for 22,566 genes clustered  
811 in consensus (blue) or standard (green) network. (B - E) Expression profiles during inflorescence  
812 development of discussed modules in the consensus network. Lines represent scaled time course  
813 expression of each gene in the module. Modules with similar expression profiles are grouped together for  
814 comparison. (F) Number of TF family members clustered in each discussed consensus module. Modules  
815 enriched (green) or depleted (pink) for TF families are highlighted ( $P < 0.01$ ). (G) Number of MIKC-  
816 MADS box clade members clustered in each consensus modules. Co-expressed MIKC-MADS box  
817 groups are shaded relative to the total number of genes in the clade.

818

819 **Figure 3:** Causal structural inference prediction of interacting transcription factors, filtered for edge  
820 weight  $\geq 0.03$ . Nodes (genes) are colored by their consensus network modules, and consensus100 module  
821 9 genes are highlighted with a yellow border. Node diameter is scaled to betweenness centrality to

822 indicate its importance within the network. Directional interactions are indicated by arrows and width is  
823 scaled to predicted interaction strength.

824

825 **Figure 4:** Divergent expression of homoeologous gene pairs during inflorescence development.

826 Expression profiles of (A) Characterized domestication and adaptation alleles and (B) Genes close to

827 QTL for spike architecture or grain size. Expression values are in TPM  $\pm$  standard error. A-genome

828 homoeologs are in orange, B-genome homoeologs are in blue. Paired t-tests were used to indicate

829 differences between homoeolog expression at each time point, *P* values < 0.05 (\*), 0.01 (\*\*), 0.001 (\*\*\*)

830 0.0001 (\*\*\*\*).

831

832 **Figure 5:** Expression profiles of WOX TFs (A) and CLE peptides (B) during wheat inflorescence

833 development. Stars indicate additional evidence of a possible role in spike regulation (green = differential

834 expression in ‘Kronos’ inflorescence, blue = associated with variation in spikelet number, red = spike-

835 dominant expression profile). Heatmaps show expression (TPM) relative to each gene’s minimum and

836 maximum expression. Only genes with TPM  $\geq$  0.05 are shown.

837

838

839 **Competing Interests**

840 The authors declare no competing interests.

841
